# Supplementary material for: Steepening of magnetosonic waves in the inner coma of comet 67P/Churyumov–Gerasimenko
Source: Copernicus journal article supplement (doi:10.5194/angeo-39-721-2021), 2021-07-29
Supplement: Supplementary file [file angeo-39-721-2021-supplement-title-page.pdf › angeo-39-721-2021-supplement-title-page.pdf]

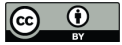

*Supplement of*

**Steepening of magnetosonic waves in the inner coma of comet 67P/Churyumov–Gerasimenko**

**Katharina Ostaszewski et al.**

*Correspondence to:* Katharina Ostaszewski (k.ostaszewski@tu-bs.de)

- [angeo-39-721-2021-supplement-title-page.pdf](#)
- [sw\\_dates.txt](#)

The copyright of individual parts of the supplement might differ from the article licence.
